# Supplementary material
Source: PubMed Central journal article supplement (PMC5691427)
Supplement: AEM.01571-17_zam999118177s1.pdf [file AEM.01571-17_zam999118177s1.pdf]

|                                                          | <i>Dolichospermum macrosporum</i> | <i>Dolichospermum flos-aquae</i> |
|----------------------------------------------------------|-----------------------------------|----------------------------------|
| December 2014 (pelagic) versus December 2014 (littoral)  | Pelagic>Litoral***                | Pelagic>Litoral***               |
| December 2015 (pelagic) versus December 2015 (littoral)  | Pelagic>Litoral***                | Pelagic>Litoral***               |
| April 2015 (pelagic) versus April 2015 (littoral)        | Pelagic>Litoral***                | Pelagic>Litoral***               |
| December 2014 (pelagic) versus April 2015 (pelagic)      | December 2014<April 2015***       | December 2014<April 2015**       |
| December 2014 (littoral) versus April 2015 (littoral)    | December>April 2015*              | December>April 2015***           |
| December 2014 (pelagic) versus December 2015 (pelagic)   | December 2014>December 2015***    | December 2014>December 2015*     |
| April 2015 (pelagic) versus December 2015 (pelagic)      | April 2015>December 2015***       | April 2015>December 2015*        |
| December 2014 (littoral) versus December 2015 (littoral) | December 2014>December 2015***    | December 2014>December 2015***   |
| April 2015 (littoral) versus December 2015 (littoral)    | April 2015>December 2015***       | April 2015>December 2015***      |

Table S1: Student tests highlighting the spatial and temporal differences of akinete distributions in sediment (\*\*\*) represents a  $p$  value  $\leq 0.001$ , \*\* represents  $0.01 \leq p$  value  $< 0.001$  and \* represents  $0.05 \leq p$  value  $< 0.01$ )

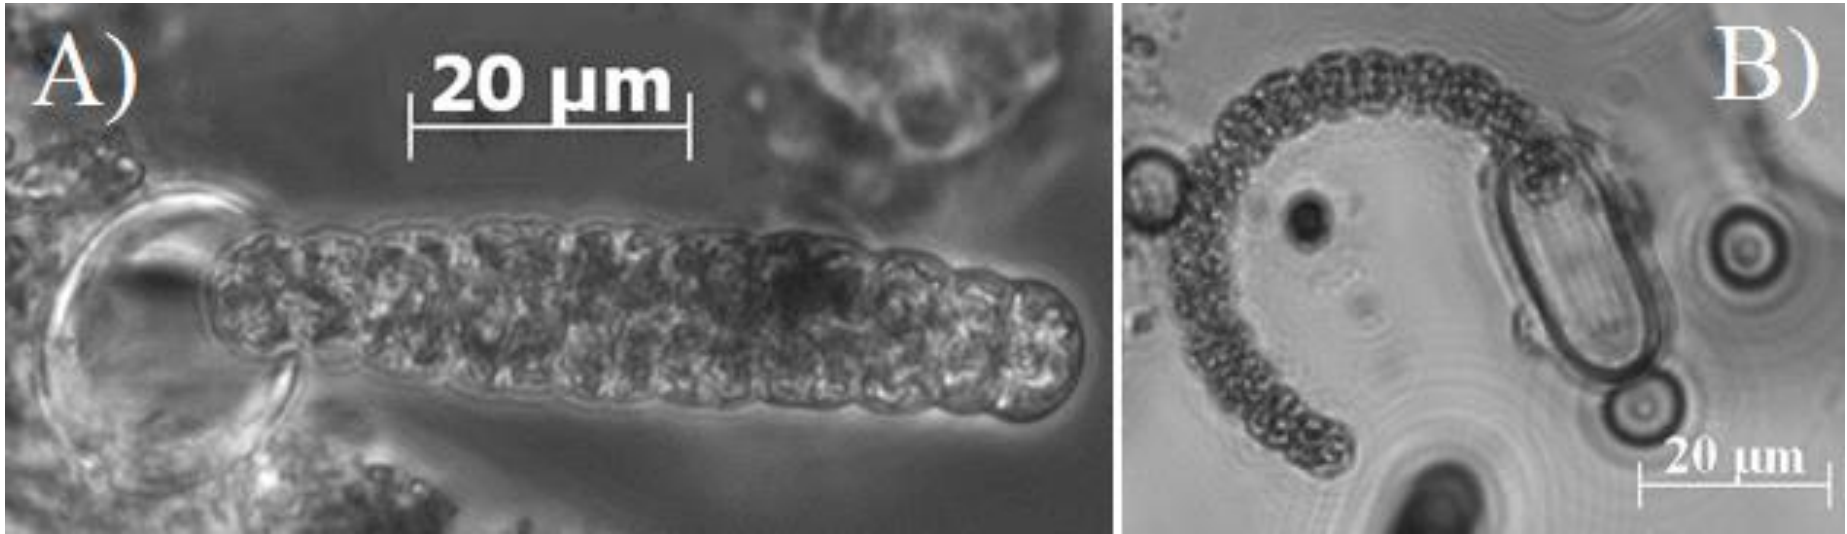

Figure S1: Photomicrographs of (A) *D. macrosporum* and (B) *D. flos-aquae* hormogonia.
